# Supplementary material
Source: PubMed Central journal article supplement (PMC2722229)
Supplement: ddp122_1.pdf [file ddp122_1.pdf]

**ScatterPlot of Excess European ancestry at marker D8S1136 and adjusted HDL-C**

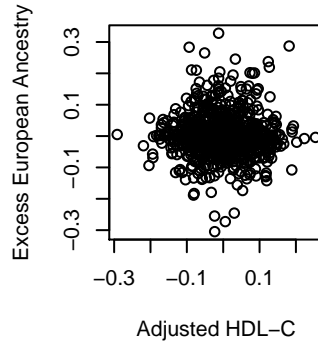

**ScatterPlot of Excess European ancestry at marker D8S1113 and adjusted HDL-C**

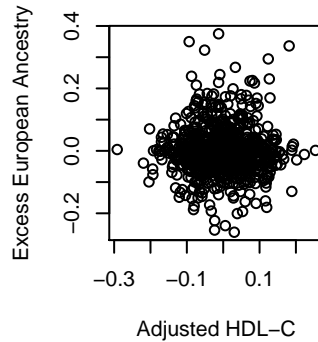

**ScatterPlot of Excess European ancestry at marker GATA193A07 and adjusted HDL-C**

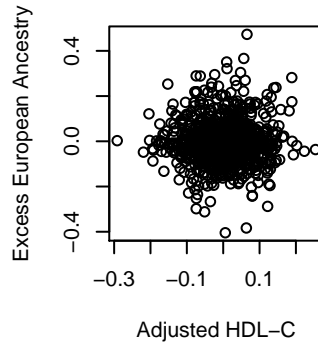

Supplementary Table 1. Marker locations with the most significant regression on ancestry for the trait LDL-C.

| <b>DNAME</b> | <b>Cytological and Genetic (cM) Location</b> | <b>Estimated (<i>r</i>)</b> | <b>Marker Names</b> |
|--------------|----------------------------------------------|-----------------------------|---------------------|
| D3S2427      | 3q26.31(188.29)                              | -2.35                       | GATA22F11           |
| D4S2367      | 4q13.2(78.43)                                | -2.33                       | GATA24H01           |
| D4S3248      | 4q13.1(72.52)                                | -2.24                       | GATA28F03           |
| D3S1763      | 3q26.1(176.54)                               | -2.21                       | GATA3H01            |
| D3S2418      | 3q28(215.84)                                 | -2.19                       | ATA22E01            |
| D7S1824      | 7q34(149.9)                                  | -2.13                       | GATA32C12           |
| D4S1627      | 4p13(60.16)                                  | -2.10                       | GATA7D01            |
| D3S1311      | 3q29(224.88)                                 | -2.08                       | AFM254VE1           |
| D3S1744      | 3q24(161.04)                                 | -2.06                       | GATA3C02            |
| D7S3061      | 7q31.32(128.41)                              | -1.96                       | GGAA6D03            |
| D11S1984     | 11p15.5(2.11)                                | 2.00                        | GGAA17G05           |
| Unknown      | 11p15(33.02)                                 | 2.00                        | ATA34E08            |
| D13S793      | 13q32.1(76.26)                               | 2.01                        | GATA43H03           |
| D14S588      | 14q24.1(75.61)                               | 2.02                        | GGAA4A12            |
| D2S1391      | 2q32.1(186.21)                               | 2.05                        | GATA65C03           |
| D21S1437     | 21q21.1(13.05)                               | 2.21                        | GGAA3C07            |
| D21S1432     | 21q21.1(2.99)                                | 2.57                        | GATA11C12           |

Supplementary Table 2. Marker locations with the most significant regression on ancestry for the trait HDL-C.

| <b>DNAME</b> | <b>Cytological and Genetic (cM) Location</b> | <b>Estimated (<math>r_i</math>)</b> | <b>Marker Names</b> |
|--------------|----------------------------------------------|-------------------------------------|---------------------|
| D8S1136      | 8q13.1(82.26)                                | -4.13                               | GATA41A01           |
| D8S1113      | 8q12.1(77.89)                                | -3.01                               | GGAA8G07            |
| Unknown      | 14q31.2(95.89)                               | -3.00                               | GATA193A07          |
| D14S606      | 14q31.1(91.62)                               | -2.61                               | GATA30A03           |
| D8S2324      | 8q21.11(94.08)                               | -2.45                               | GATA14E09           |
| D10S1208     | 10p11.21(63.3)                               | -2.34                               | ATA5A04             |
| D14S588      | 14q24.1(75.61)                               | -2.33                               | GGAA4A12            |
| D10S1426     | 10p11.23(59.03)                              | -2.17                               | GATA73E11           |
| D8S1110      | 8q11.23(67.27)                               | -2.04                               | GATA8G10            |
| D4S2366      | 4p16.1(12.93)                                | -2.01                               | GATA22G05           |
| D5S2849      | 5p15.33(7.77)                                | 2.00                                | GATA145D10          |
| D17S784      | 17q25.3(116.86)                              | 2.03                                | AFM044XG3           |
| Unknown      | 12q23.2(109.47)                              | 2.05                                | PAH                 |
| D12S1300     | 12q23.1(104.12)                              | 2.12                                | GATA85A04           |
| D15S816      | 15q26.2(100.59)                              | 2.14                                | GATA73F01           |
| D17S1301     | 17q25.1(100.02)                              | 2.16                                | GATA28D11           |
| D9S930       | 9q32(120.04)                                 | 2.16                                | GATA48D07           |
| D6S1021      | 6q16.3(112.2)                                | 2.28                                | ATA11D10            |
| D6S474       | 6q21(118.64)                                 | 2.37                                | GATA31              |
| D9S910       | 9q22.33(104.48)                              | 2.69                                | ATA18A07            |
| D9S938       | 9q31.1(110.93)                               | 2.69                                | GGAA22E01           |

Supplementary Table 3. Marker locations with the most significant regression on ancestry for the trait TG

| <b>DNAME</b> | <b>Cytological and Genetic (cM) Location</b> | <b>Estimated (<math>r_i</math>)</b> | <b>Marker Names</b> |
|--------------|----------------------------------------------|-------------------------------------|---------------------|
| D15S652      | 15q26.1(90.02)                               | -2.75                               | ATA24A08            |
| D15S816      | 15q26.2(100.59)                              | -2.69                               | GATA73F01           |
| D15S659      | 15q21.1(43.47)                               | -2.40                               | GATA63A03           |
| D21S1446     | 21q22.3(57.77)                               | -2.24                               | GATA70B08           |
| D15S643      | 15q22.2(52.33)                               | -2.18                               | GATA50G06           |
| D15S655      | 15q25.3(82.84)                               | -2.07                               | ATA28G05            |
| D17S784      | 17q25.3(116.86)                              | -2.03                               | AFM044XG3           |
| D9S938       | 9q31.1(110.93)                               | -2.00                               | GGAA22E01           |
| D5S1456      | 5q35.1(174.8)                                | 1.99                                | GATA11A11           |
| D11S2371     | 11q13.4(76.13)                               | 2.06                                | GATA90D07           |
| D2S1399      | 2q22.3(152.04)                               | 2.15                                | GGAA20G04           |
| D8S1132      | 8q23.1(119.22)                               | 2.19                                | GATA26E03           |
| D8S2324      | 8q21.11(94.08)                               | 2.24                                | GATA14E09           |
| D8S1136      | 8q13.1(82.26)                                | 2.31                                | GATA41A01           |
| D8S1113      | 8q12.1(77.89)                                | 2.31                                | GGAA8G07            |
| D8S1128      | 8q24.21(139.53)                              | 2.43                                | GATA21C12           |
| D11S2002     | 11q14.1(85.48)                               | 2.46                                | GATA30G01           |
| D8S592       | 8q24.11(125.27)                              | 2.48                                | GATA6B02            |
| D8S373       | 8q24.3(164.47)                               | 2.53                                | UT721               |
| D8S1179      | 8q24.13(135.08)                              | 2.59                                | GATA7G07            |
